# Supplementary material for: Photoreactivity of the fungicide chlorothalonil in aqueous medium
Source: Royal Society of Chemistry journal article supplement (doi:10.1039/c3em00537b), 2014-01-01
Supplement: c3em00537b.pdf [file c3em00537b.pdf]

## Supporting information

### Photoreactivity of the fungicide chlorothalonil in aqueous medium

Samira Bouchama<sup>1,2</sup>, Pascal de Sainte-Claire<sup>1,3</sup>, Emmanuel Arzoumanian<sup>4</sup>, Esther Oliveros<sup>4</sup>,  
Abdelaziz Boulkamh<sup>2</sup>, Claire Richard<sup>1,5\*</sup>

<sup>1</sup> Clermont Université, Institut de Chimie de Clermont-Ferrand, BP 10448, 63000 Clermont-Ferrand, France.

<sup>2</sup> Laboratoire des Techniques Innovantes de Protection de l'Environnement, Université de Constantine 1, Route de Aïn-el-Bey, 25000 Constantine, Algérie.

<sup>3</sup> Clermont Université, ENSCCF, Institut de Chimie de Clermont-Ferrand, BP 10448, 63000 Clermont-Ferrand, France.

<sup>4</sup> Laboratoire des IMRCP, UMR CNRS 5623, Université Toulouse III (Paul Sabatier, UPS), 31062 Toulouse Cedex 9, France.

<sup>5</sup> Equipe Photochimie CNRS, UMR 6296, ICCF, F-63171 Aubière, France.

Figure SI-1: Emission spectrum of the fluorescent tubes

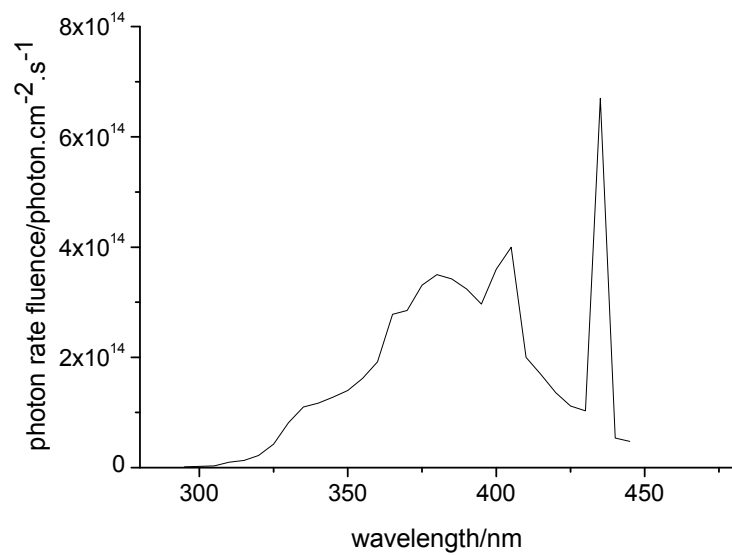

Figure SI-2: Absorption spectrum of CT ( $5 \times 10^{-6}$  M) in acetonitrile/water pH 8 (5:95, v/v) in a cell of 2-cm path

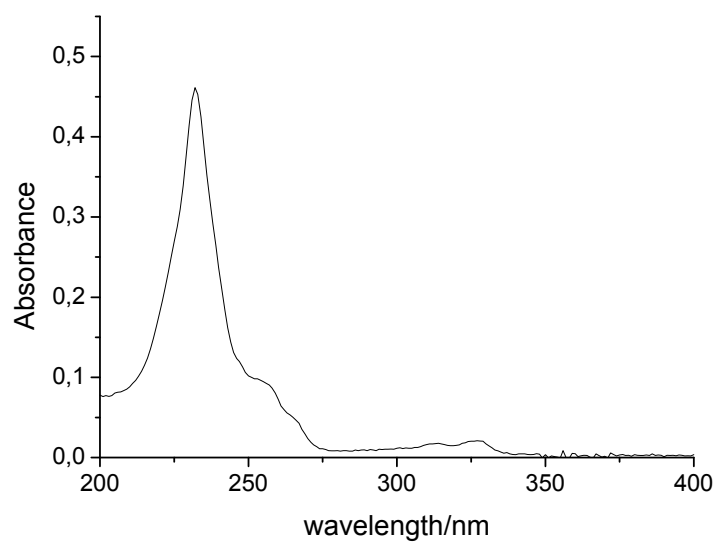

Figure SI-3: Absorption spectrum of an aerated CT solution in 50% ACN, before (black line) and after (red line) irradiation.

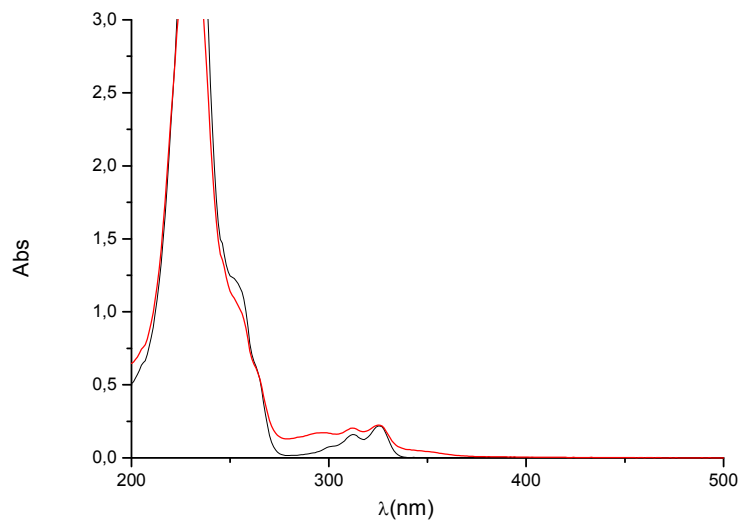

Figure SI-4 : Influence of the percentage of acetonitrile on  $k_d^{\text{aerated}}$

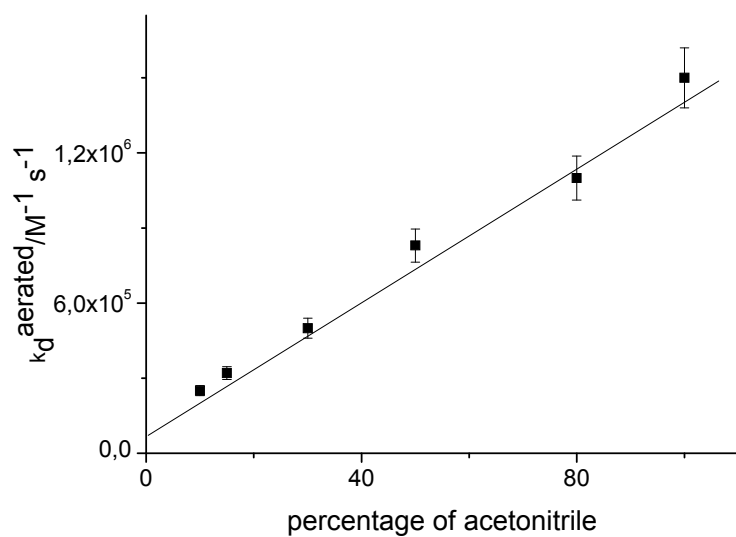

Figure SI-5: Absorbance profile measured at 320 nm upon irradiation of CT in isopropanol

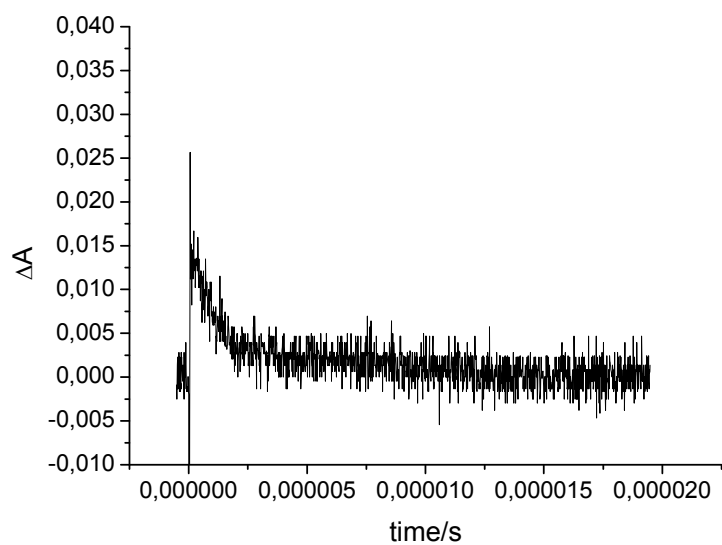

### Singlet oxygen measurements

The quantum yields of  $^1\text{O}_2$  production ( $\Phi_\Delta$ ) were determined by recording the  $^1\text{O}_2$  emission signal upon continuous monochromatic excitation of the sensitizer<sup>1-3</sup>. PN is a standard singlet oxygen sensitizer with a  $\Phi_\Delta^{\text{PN}}$  close to 1 in a large variety of solvents<sup>4-7</sup> and was chosen as a reference in this work.

Wavelengths of 367 nm and 313 nm were chosen to irradiate solutions of PN and CT respectively. Under continuous irradiation, the quantum yield of  $^1\text{O}_2$  emission is given by:

$$\Phi_e = C S_e P_a \quad (1)$$

where  $C$  is a proportionality factor depending on geometric and electronic characteristics of the detection system and on specific parameters of the medium (refractive index, NIR absorbance),  $S_e$  is the  $^1\text{O}_2$  signal intensity,  $P_a$  that is equal to  $P_0(1-10^{-A})$  is the photon flux absorbed by the sensitizer ( $P_0$  and  $A$  are the incident photon flux and the absorbance of the sensitizer at the wavelength of excitation, respectively).  $\Phi_e$  may be also expressed as:

$$\Phi_e = \Phi_\Delta k_e \tau_\Delta \quad (2)$$

where  $k_e$  is the rate constant of  $^1\text{O}_2$  emission and  $\tau_\Delta$  the  $^1\text{O}_2$  lifetime. In the absence of quencher one has:

$$\tau_\Delta = 1/k_d \quad (3)$$

with  $k_d$ , rate constant in  $\text{s}^{-1}$  of  $^1\text{O}_2$  deactivation by the solvent,  $k_e$  and  $k_d$  being medium dependent and  $k_e \ll k_d$  in most solvents.<sup>8-10</sup> while in the presence of a quencher (Q) that may be the sensitizer itself, one has:

$$\tau_\Delta = \frac{1}{(k_d + k_t^{\text{Q}}[Q])} \quad (4)$$

The rate constant of  $^1\text{O}_2$  total quenching (physical and reactive quenching) ( $k_t^{\text{CT}}$ ) and the quantum yield of  $^1\text{O}_2$  production ( $\Phi_\Delta$ ) by CT were determined by relative measurements,

using PN as a reference sensitizer. Combining eqns. (1) to (4), the ratio of the  $^1\text{O}_2$  luminescence quantum yields for CT and PN in the same solvent is given by:

$$\frac{\Phi_e}{\Phi_e^{PN}} = \frac{\Phi_\Delta}{\Phi_\Delta^{PN}} \frac{k_d + k_t^{PN}[PN]}{k_d + k_t^{CT}[CT]} = \frac{CS_e}{C_{PN}S_e^{PN}} \frac{P_0^R(1-10^{-A(\lambda_{PN})})}{P_0(1-10^{-A(\lambda)})} \quad (5)$$

where  $\Phi_\Delta^{PN}$  and  $\Phi_\Delta$  are, respectively, the quantum yields of  $^1\text{O}_2$  production by the reference sensitizer (PN) and CT. The determination of  $\frac{\Phi_\Delta}{\Phi_\Delta^{PN}}$  and of  $k_t^{CT}$  is possible when the following conditions are satisfied:

- The absorbance of the sample and reference are the same at the corresponding wavelengths of excitation ( $\lambda$  and  $\lambda_{PN}$ ): in this case, the absorption factors ( $1-10^{-A}$ ) and the apparatus factor (C) remain identical in both systems;
- The reference sensitizer (PN) is chosen so that  $k_t^{PN}[PN] \ll k_d$ . Within the limits of error, the ratio  $\frac{S_e^{PN}}{S_e^{CT}} \frac{(1-10^{-A(\lambda)})}{(1-10^{-A(\lambda_{PN})})} \frac{P_0}{P_0^{PN}}$  does not significantly change in the studied domain of CT concentrations. Therefore, we conclude that the product  $k_t^{Sens}[Sens] \ll k_d$ .

When these conditions are fulfilled, eqn. (5) simplifies to eqn. (6):

$$\frac{S_e^{PN}}{S_e^{CT}} = \frac{P_0^{PN}}{P_0} \frac{\Phi_\Delta^{PN}}{\Phi_\Delta} (1 + \tau_\Delta k_t^{CT}[CT]) \quad (6)$$

and the plot of  $\frac{S_e^{PN}}{S_e^{CT}} = f([CT])$  should be linear. Thus, values of  $k_t^{CT}$  and  $\frac{\Phi_\Delta^{PN}}{\Phi_\Delta}$  may be obtained from the slope and the intercept of this plot if the value of  $\tau_\Delta$  is known. In our case, probe and reference were irradiated at different wavelengths (313 nm and 367 nm respectively) and

$$\frac{P_0^{PN}}{P_0} = 1.88.$$

1 T. Aminian-Saghafi, G. Nasini, T. Caronna, A. M. Braun and E. Oliveros, *Helv. Chim. Acta*, 1992, **75**, 531-538.

- 2 C. Lorente, A. H. Thomas, A. L. Capparelli, C. G. Martinez, A. M. Braun and E. Oliveros, *Photochem. Photobiol. Sci.*, 2003, **2**, 245-250.
- 3 F. M. Cabrerizo, M. L. Dantola, G. Petroselli, A. L. Capparelli, A. H. Thomas, A. M. Braun, C. Lorente, E. Oliveros, *Photochem. Photobiol.*, 2007, **83**, 526-534.
- 4 E. Oliveros, P. Suardi-Murasecco, T. Aminian-Saghafi, A. M. Braun and H.-J. Hansen, *Helv. Chim. Acta*, 1991, **74**, 79-90.
- 5 R. Schmidt, C. Tanielian, R. Dunsbach and C. Wolff, *J. Photochem. Photobiol. A*, 1994, **79**, 11- 17.
- 6 C. Martí, O. Jürgens, O. Cuenca, M. Casals and S. Nonell, *J. Photochem. Photobiol.*, A, 1996, **97**, 11–18.
- 7 J. Arnbjerg, M. J. Paterson, C. B. Nielsen, M. Jørgensen, O. Christiansen and P. R. Ogilby, *J. Phys. Chem. A*, 2007, **111**, 5756- 5767.
- 8 F. Wilkinson, H. P. Helman, A. B. Ross, *J. Phys. Chem. Ref. Data*, 1995, **24**, 663-934.
- 9 R. D. Scurlock, S. Nonell, S. E. Braslavsky, P. R. Ogilby, *J. Phys. Chem.*, 1995, **99**, 3521-3526.
- 10 L. A. Martinez, C. G. Martinez, B. B. Klopotek, J. Lang, A. Neuner, A. M. Braun, E. Oliveros, *J. Photochem. Photobiol. B: Biol.*, 2000, **58**, 94-107.



Table SI-1. Values of  $S_e^{PN}$ ,  $S_e^{CT}$ ,  $\frac{S_e^{PN}}{S_e^{CT}} \frac{(1-10^{-A(\lambda)})}{(1-10^{-A(\lambda_{PN})})} \frac{P_0}{P_0^{PN}}$  and  $\Phi_\Delta$  in solutions with different percentages of acetonitrile (100, 80, 50 and 30) in acetonitrile/D<sub>2</sub>O mixtures.

|              | $A^{PN}$ (367<br>nm) | $S_e^{PN}$<br>(a.u.) | $A^{CT}$ (313 nm) | $S_e^{CT}$<br>(a.u.) | $\frac{S_e^{PN}}{S_e^{CT}} \frac{(1-10^{-A(\lambda)})}{(1-10^{-A(\lambda_{PN})})} \frac{P_0}{P_0^{PN}}$ | $\Phi_\Delta$ |
|--------------|----------------------|----------------------|-------------------|----------------------|---------------------------------------------------------------------------------------------------------|---------------|
| 100 %<br>ACN | 0.82                 | 124                  | 0.82              | 58                   | 0.88                                                                                                    | 0.85<br>±0.06 |
|              | 0.6                  | 114                  | 0.67              | 52                   | 0.82                                                                                                    |               |
|              | 0.41                 | 72                   | 0.41              | 35                   | 0.91                                                                                                    |               |
|              | 0.2                  | 41                   | 0.26              | 21                   | 0.79                                                                                                    |               |
| 80 %<br>ACN  | 0.86                 | 132                  | 0.94              | 64                   | 0.89                                                                                                    | 0.85<br>±0.04 |
|              | 0.63                 | 105                  | 0.7               | 51                   | 0.87                                                                                                    |               |
|              | 0.42                 | 79                   | 0.48              | 39                   | 0.86                                                                                                    |               |
|              | 0.2                  | 43                   | 0.26              | 22                   | 0.79                                                                                                    |               |
| 50 %<br>ACN  | 0.88                 | 86                   | 0.91              | 40                   | 0.87                                                                                                    | 0.85<br>±0.02 |
|              | 0.67                 | 83                   | 0.64              | 37                   | 0.85                                                                                                    |               |
|              | 0.42                 | 49                   | 0.38              | 20                   | 0.82                                                                                                    |               |
|              | 0.22                 | 34.5                 | 0.21              | 15                   | 0.85                                                                                                    |               |
| 30%<br>ACN   | 0.33                 | 36                   | 0.35              | 12                   | 0.6                                                                                                     | 0.69<br>±0.08 |
|              | 0.22                 | 26                   | 0.25              | 10.5                 | 0.69                                                                                                    |               |
|              | 0.11                 | 14                   | 0.14              | 7                    | 0.76                                                                                                    |               |
